# Supplementary material for: In vitro vascular differentiation system efficiently produces natural killer cells for cancer immunotherapies
Source: PubMed Central journal article supplement — Oncoimmunology. 2023 Sep 12;12(1):2240670. doi: 10.1080/2162402X.2023.2240670 (PMC10501168; doi:10.1080/2162402x.2023.2240670), 2023-09-12
Supplement: KONI_A_2240670_SM7400.pdf [file KONI_A_2240670_SM7400.pdf]

## SUPPLEMENTARY MATERIAL

### **Figure S1**

(A) Flow cytometric analysis of mouse peripheral blood stained with isotype controls. (B) Flow cytometric analysis showing that human cord blood-isolated CD34<sup>+</sup> cells were 54% positive for human CD45<sup>+</sup> (peripheral blood gated on the lymphocyte population). (C) Cytotoxicity assay demonstrating that hPSC-NKs kill 76% of K562 cells within 4 hrs of incubation, while PB-NKs kill 30%. (D) Isotype controls demonstrating the specificity of CD56, CD16, CD94, NKp46, NKG2A, and KIR staining. (E) Immunofluorescence image of the isotype control for the Granzyme B stain in Panel D (Figure 3). This image depicts the DAPI stain (blue) localized to hPSC-NK cell nuclei. (F) Isotype controls demonstrating the specificity of perforin, TNF $\alpha$ , and IFN $\gamma$  staining.

### **Table S1**

NK Cytotoxicity Assay data table showing hPSC-NK:target cell ratios and hPSC-NK cytotoxicity percentages on the basis of propidium iodide staining. For this assay, hPSC-NKs were co-cultured with K562 tumor cells.

# Figure S1

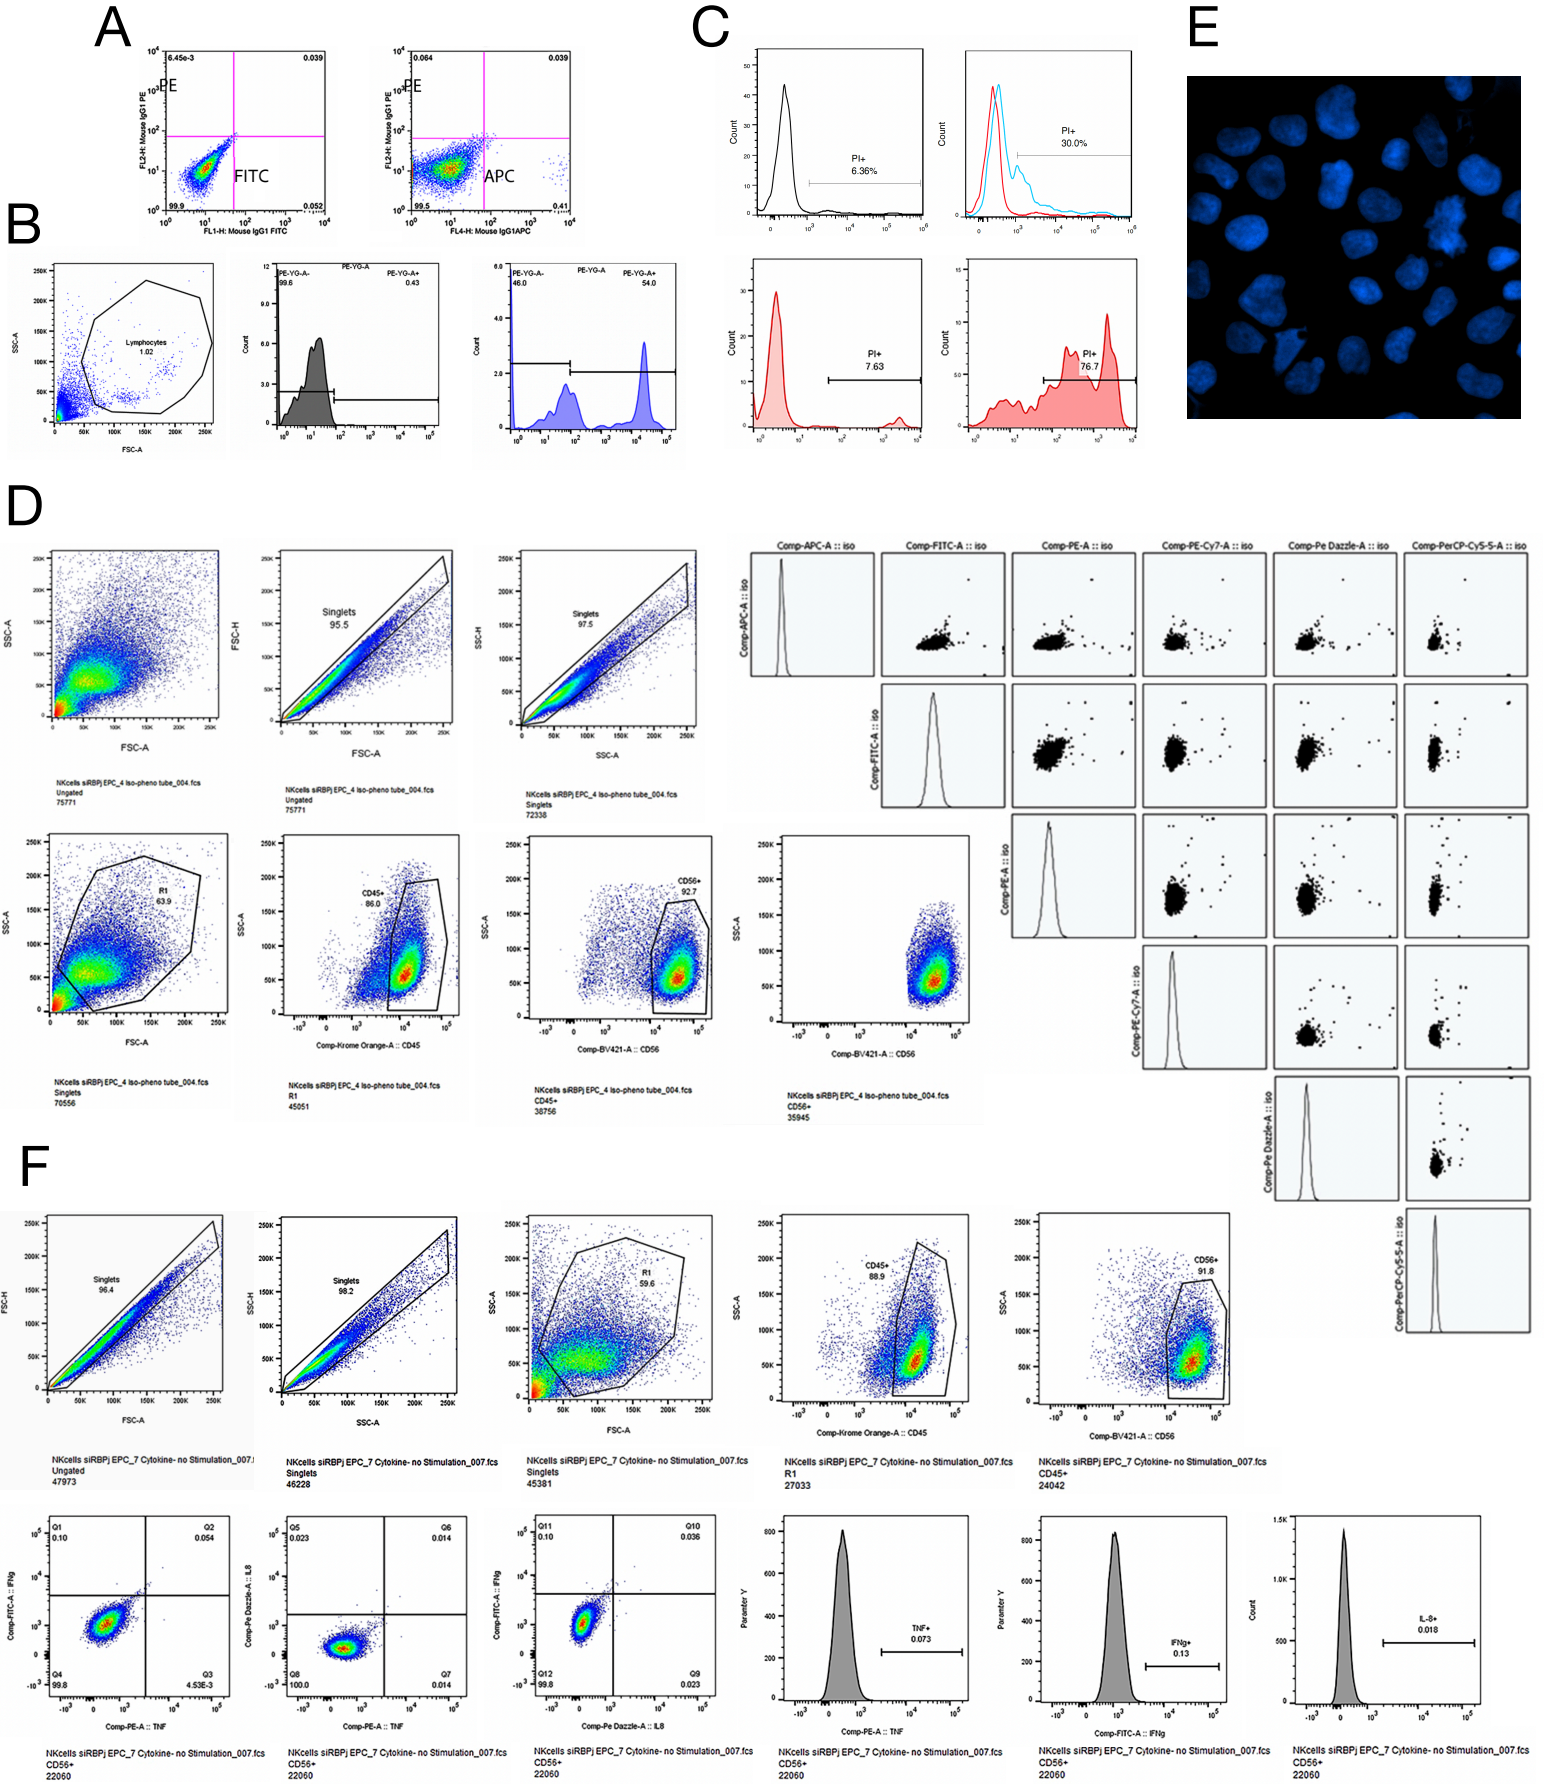

# Table S1

## NK CYTOTOXICITY ASSAY

| Assay # | hPSC-NK Sample # | hPSC-NK:Target Cell Ratio | Tube Name                                  | K562/PI+ %  | hPSC-NK Cytotoxicity |
|---------|------------------|---------------------------|--------------------------------------------|-------------|----------------------|
| Assay 1 | Sample1          | 40:1                      | Green K562 A-1 00084840 001.LMD            | 68.8        | <b>61.2</b>          |
|         | Sample1          | 20:1                      | Green K562 A-1 00084841 002.LMD            | 69.7        | <b>62.1</b>          |
| Assay 2 | Sample2          | 40:1                      | Green K562 A-2 00084842 001.LMD            | 71.4        | <b>63.8</b>          |
|         | Sample2          | 20:1                      | Green K562 A-2 00084843 002.LMD            | 72.5        | <b>64.9</b>          |
| Assay 3 | Sample3          | 40:1                      | Green K562 A-3 00084844 001.LMD            | 76.7        | <b>69.1</b>          |
|         | Sample3          | 20:1                      | Green K562 A-3 00084845 002.LMD            | 75.8        | <b>68.2</b>          |
| Assay 4 | Sample1          | 10:1                      | Green K562 B-1 00084846 001.LMD            | 61.1        | <b>53.5</b>          |
|         | Sample1          | 5:1                       | Green K562 B-1 00084847 002.LMD            | 56.3        | <b>48.7</b>          |
| Assay 5 | Sample2          | 10:1                      | Green K562 B-2 00084848 001.LMD            | 66.5        | <b>58.9</b>          |
|         | Sample2          | 5:1                       | Green K562 B-2 00084849 002.LMD            | 63.4        | <b>55.8</b>          |
| Assay 6 | Sample3          | 10:1                      | Green K562 B-3 00084850 001.LMD            | 64.5        | <b>56.9</b>          |
|         | Sample3          | 5:1                       | Green K562 B-3 00084851 002.LMD            | 62.2        | <b>54.6</b>          |
|         | <b>K562 ONLY</b> |                           | <b>K562 contr N1G CTA 00084787 001.LMD</b> | <b>7.63</b> |                      |
